# Supplementary material
Source: Research Square preprint supplement (doi:10.21203/rs.3.rs-10191922/v1)
Supplement: Supplementary file 1 [file 5038712e10ab4bbf6c6548e2.docx]

# Additional file 2. STROBE reporting checklist

This draft checklist maps STROBE items to the BMC Medicine manuscript sections. Page and line numbers should be completed after final Word pagination.
