# Supplementary material
Source: Research Square preprint supplement (doi:10.21203/rs.3.rs-10191922/v1)
Supplement: Supplementary file 2 [file fce70531245bef0e62da663c.docx]

# Additional file 1. Supplementary methods, figures, and tables

## Supplementary methods

This supplementary material supports the BMC Medicine Research article submission and is organised around the main reviewer questions raised by the study design, measurement, mortality modelling, healthcare response equity analysis, and standardised scenario estimates.

Longitudinal mortality analyses used cohorts with follow-up for death and harmonised functional measures. Healthcare response analyses were restricted to cohorts with linked person-wave healthcare variables.

Cohort-specific Cox proportional hazards models were used for mortality. Estimates were summarised using random-effects meta-analysis, with heterogeneity reported using I2 and tau2. Pooled estimates are interpreted as cross-cohort summaries of direction and magnitude rather than universal causal effects.

Walking difficulty defined the high-need denominator. Within that denominator, education gradients in healthcare response were estimated using RII and SII models. Need-adjusted specifications included age, sex, calendar year or wave, multimorbidity, arthritis, falls, depressive symptoms, and rural residence where available. Repeated person-wave observations used person-clustered standard errors.

Standardised what-if estimates set lower- and middle-education groups to the need-adjusted response level observed among higher-education participants and expressed the resulting difference as events per 1000 high-need older adults. These are policy-relevant benchmark analyses, not causal intervention effects.

## Supplementary figures

Supplementary Figure S1. Data sources, measurement timing, and harmonisation. Panels summarise cohort eligibility, key variable availability, measurement timing, and harmonised measure availability. This figure documents the denominator and measurement basis for the mortality and healthcare response analyses. Composite figure file supplied as Additional_file_1_Figure_S1_data_measurement.pdf and Additional_file_1_Figure_S1_data_measurement.tiff.

Supplementary Figure S2. Mortality robustness and influence analyses. Panels show pooled and cohort-specific mortality associations, leave-one-cohort-out influence checks, progressive adjustment for grip strength, and functional severity dose-response. These analyses assess whether the functional-marker mortality evidence depends on a single cohort or model specification. Composite figure file supplied as Additional_file_1_Figure_S2_mortality_robustness.pdf and Additional_file_1_Figure_S2_mortality_robustness.tiff.

Supplementary Figure S3. Deployability, missingness, and generalisability. Panels compare self-reported walking difficulty with objective grip strength, show grip-strength missingness, display exploratory discrimination, compare weighted and unweighted population attributable fractions, and summarise income-setting heterogeneity. These results support walking difficulty as the more deployable high-need denominator. Composite figure file supplied as Additional_file_1_Figure_S3_deployability_generalizability.pdf and Additional_file_1_Figure_S3_deployability_generalizability.tiff.

Supplementary Figure S4. Healthcare response equity sensitivity evidence. Panels show RII sensitivity across definitions, need-adjusted absolute SII response patterns, cost-related unmet-need mechanism models, and contextual health-system interpretation. These analyses support within-cohort interpretation of the healthcare response equity findings. Composite figure file supplied as Additional_file_1_Figure_S4_health_system_equity.pdf and Additional_file_1_Figure_S4_health_system_equity.tiff.

## Supplementary tables

### Supplementary Table S1. inclusion by analysis

| **cohort** | **raw_person_waves** | **unique_persons** | **age>=45** | **walk_available** | **grip_available** | **death_events_baseline** | **RII_eligible** |
| --- | --- | --- | --- | --- | --- | --- | --- |
| CHARLS | 93950 | 25389 | 93950 | 71940 | 41097 | 2735 | yes |
| ELSA | 89290 | 19615 | 89290 | 89065 | 29537 | 848 | no |
| HRS | 206415 | 36247 | 206415 | 204521 | 56016 | 13390 | yes |
| KLoSA | 44273 | 9238 | 44273 | 0 | 37473 | 1716 | no |
| MHAS | 46721 | 21262 | 46721 | 43005 | 2015 | 2197 | yes |
| SHARE | 325651 | 136141 | 325651 | 324553 | 296177 | 20051 | yes |

### Supplementary Table S2. variable definitions

| **harmonized_variable** | **raw_source** | **coding** | **notes** |
| --- | --- | --- | --- |
| walking difficulty | walk100a / walk1a | 1=difficulty, 0=no difficulty | self-reported mobility limitation |
| grip strength | gripsum or max(left,right) | cohort z-score | objective/measured function |
| ADL disability | adlab_c/adltot6/adl6a/adlfour | >=1 limitation | self-reported basic function |
| IADL disability | iadl/iadltot2_e/iadl5a/iadlfour | >=1 limitation | self-reported instrumental function |
| mortality | radyear or cohort-specific death year | death year or event | all-cause mortality |
| doctor contact | doctor / doctor1y | 1=contact | recall windows differ by cohort |
| education | raeducl | 1 low, 2 middle, 3 high | RII ridit ranking |
| survey weight | cohort-specific | positive weights | sensitivity analysis |

### Supplementary Table S3. baseline characteristics

| **cohort** | **n** | **age_mean** | **female_pct** | **bmi_mean** | **walk_pct** | **grip_available_pct** | **deaths** |
| --- | --- | --- | --- | --- | --- | --- | --- |
| CHARLS | 25389 | 57.34 | 51.4 | 26.84 | 4.1 | 79.99 | 2735 |
| ELSA | 19615 | 61.15 | 54.28 | 28.14 | 10.53 | 64.5 | 848 |
| HRS | 36247 | 61.53 | 56.57 | 28.1 | 12.95 | 71.22 | 13390 |
| KLoSA | 9238 | 64.11 | 56.56 | 23.18 |  | 94.24 | 1716 |
| MHAS | 21262 | 62.01 | 56.57 | 27.66 | 11.44 | 9.48 | 2197 |
| SHARE | 136141 | 64.0 | 55.43 | 26.88 | 10.51 | 93.98 | 20051 |

### Supplementary Table S4. missingness measurement timing

| **cohort** | **n** | **bmi_later_first_available_%** | **walk_later_first_available_%** | **grip_z_later_first_available_%** | **iadl_later_first_available_%** | **adl_later_first_available_%** |
| --- | --- | --- | --- | --- | --- | --- |
| CHARLS | 25389 | 11.7 | 5.8 | 12.0 | 0.8 | 3.4 |
| ELSA | 19615 | 48.2 | 0.5 | 50.8 | 46.2 | 0.5 |
| HRS | 36247 | 1.6 | 0.9 | 57.0 | 0.4 | 0.4 |
| KLoSA | 9238 | 1.4 | 0.0 | 5.7 | 0.0 | 0.0 |
| MHAS | 21262 | 6.4 | 3.2 | 0.0 | 3.1 | 3.1 |
| SHARE | 136141 | 1.5 | 0.2 | 2.9 | 0.0 | 0.0 |

### Supplementary Table S5. mortality models

| **outcome** | **cohort** | **HR** | **CI_l** | **CI_u** | **p** | **events** | **n** |
| --- | --- | --- | --- | --- | --- | --- | --- |
| Walking difficulty | CHARLS | 1.979 | 1.724 | 2.273 | 3.878721623034562e-22 | 2163.0 | 19721 |
| Walking difficulty | ELSA | 1.596 | 1.216 | 2.094 | 0.0007447754484177 | 436.0 | 11865 |
| Walking difficulty | HRS | 2.379 | 2.277 | 2.485 | 0.0 | 13240.0 | 34403 |
| Walking difficulty | MHAS | 2.274 | 2.035 | 2.542 | 2.350340988455318e-47 | 1575.0 | 14988 |
| Walking difficulty | SHARE | 2.239 | 2.163 | 2.318 | 0.0 | 19383.0 | 89692 |
| Walking difficulty | POOLED | 2.207 | 2.063 | 2.362 | 8.903641851294585e-116 |  | I2=74%,k=5 |
| IADL disability | CHARLS | 1.593 | 1.457 | 1.742 | 1.8237309845537305e-24 | 2259.0 | 19875 |
| IADL disability | ELSA | 0.776 | 0.619 | 0.974 | 0.0285116912672536 | 436.0 | 11865 |
| IADL disability | HRS | 2.167 | 2.076 | 2.262 | 1.3282174723654196e-272 | 13334.0 | 34499 |
| IADL disability | MHAS | 1.795 | 1.607 | 2.004 | 2.9975094548354585e-25 | 1907.0 | 15584 |
| IADL disability | POOLED | 1.514 | 1.145 | 2.002 | 0.0036146029552528 |  | I2=97%,k=4 |
| ADL disability | CHARLS | 1.547 | 1.41 | 1.698 | 3.225409052990431e-20 | 2259.0 | 19875 |
| ADL disability | ELSA | 1.28 | 1.02 | 1.605 | 0.0331238538318659 | 436.0 | 11865 |
| ADL disability | HRS | 1.975 | 1.896 | 2.058 | 7.372605176584582e-232 | 13334.0 | 34499 |
| ADL disability | MHAS | 1.501 | 1.354 | 1.664 | 1.1765905114831516e-14 | 1907.0 | 15584 |
| ADL disability | POOLED | 1.581 | 1.309 | 1.91 | 1.983056911512626e-06 |  | I2=94%,k=4 |
| Grip strength per +1 SD | CHARLS | 0.741 | 0.703 | 0.782 | 1.6033130661827703e-28 | 2221.0 | 19778 |
| Grip strength per +1 SD | ELSA | 0.77 | 0.667 | 0.888 | 0.0003329289937109 | 430.0 | 11790 |
| Grip strength per +1 SD | HRS | 0.67 | 0.646 | 0.695 | 2.0643373188259077e-102 | 7114.0 | 25390 |
| Grip strength per +1 SD | KLoSA | 0.712 | 0.651 | 0.779 | 1.0358645499691359e-13 | 1328.0 | 8417 |
| Grip strength per +1 SD | MHAS | 0.566 | 0.46 | 0.695 | 6.457251099828656e-08 | 176.0 | 1931 |
| Grip strength per +1 SD | SHARE | 0.698 | 0.683 | 0.714 | 8.154988722477461e-218 | 17202.0 | 86545 |
| Grip strength per +1 SD | POOLED | 0.701 | 0.672 | 0.731 | 3.833977157712382e-60 |  | I2=68%,k=6 |

### Supplementary Table S6. meta parameters

| **outcome** | **k** | **pooled_HR** | **CI_l** | **CI_u** | **I2** | **tau2** |
| --- | --- | --- | --- | --- | --- | --- |
| ADL disability | 4 | 1.5815 | 1.3094 | 1.9101 | 93.9517 | 0.033 |
| IADL disability | 4 | 1.5141 | 1.1451 | 2.0019 | 97.2303 | 0.0767 |
| Grip strength per +1 SD | 6 | 0.7006 | 0.6715 | 0.7309 | 67.8695 | 0.0015 |
| Walking difficulty | 5 | 2.2074 | 2.0626 | 2.3624 | 73.799 | 0.0034 |

### Supplementary Table S7. robustness summary

| **analysis** | **measure** | **estimate** | **notes** |
| --- | --- | --- | --- |
| dose response | 1 limitation | OR 1.37 | vs 0 |
| dose response | 2 limitations | OR 1.78 | vs 0 |
| dose response | 3+ limitations | OR 2.63 | vs 0 |
| progressive adjustment | grip age/sex | OR 0.64 | per +1 SD |
| progressive adjustment | grip +BMI | OR 0.65 | per +1 SD |
| progressive adjustment | grip +multimorbidity | OR 0.68 | per +1 SD |

### Supplementary Table S8. objective selfreport agreement

| **cohort** | **g1** | **g0** | **diff** | **r** | **p** |
| --- | --- | --- | --- | --- | --- |
| CHARLS | -0.67 | 0.125 | 0.795 | -0.151 | 0.0 |
| ELSA | -0.44 | 0.156 | 0.596 | -0.165 | 0.0 |
| HRS | -0.299 | 0.177 | 0.477 | -0.131 | 0.0 |
| MHAS | -0.532 | 0.074 | 0.606 | -0.196 | 0.0 |
| SHARE | -0.649 | 0.128 | 0.776 | -0.215 | 0.0 |

### Supplementary Table S9. PAF calculations

| **cohort** | **income** | **HR** | **prev_u** | **prev_w** | **paf_u** | **paf_w** | **wt_cov** |
| --- | --- | --- | --- | --- | --- | --- | --- |
| CHARLS | LMIC | 1.98 | 4.1 | 4.54 | 3.86 | 4.26 | 68.94 |
| MHAS | LMIC | 2.27 | 11.44 | 11.03 | 12.73 | 12.32 | 95.76 |
| HRS | HIC | 2.38 | 12.95 | 10.71 | 15.15 | 12.86 | 89.28 |
| ELSA | HIC | 1.6 | 10.53 | 11.56 | 5.9 | 6.44 | 68.3 |
| SHARE | HIC | 2.24 | 10.51 | 10.52 | 11.52 | 11.53 | 98.1 |

### Supplementary Table S10. RII SII models

*Part A: limited_definition, weighted, n_personwaves, n_persons, doctor_events, access_rate, RII*

| **cohort** | **center_year** | **outcome** | **limited_definition** | **weighted** | **n_personwaves** | **n_persons** | **doctor_events** | **access_rate** | **RII** |
| --- | --- | --- | --- | --- | --- | --- | --- | --- | --- |
| CHARLS | 2013 | doctor | limited_walk | False | 4547 | 3259 | 1111 | 0.2443369254453485 | 1.8360478615711495 |
| HRS | 2013 | doctor | limited_walk | False | 33484 | 13542 | 31876 | 0.9519770636722016 | 6.3277062045643415 |
| MHAS | 2013 | doctor | limited_walk | False | 5761 | 4194 | 4860 | 0.8436035410519007 | 1.8932936075407003 |
| SHARE | 2013 | doctor | limited_walk | False | 35798 | 24289 | 33960 | 0.9486563495167328 | 1.4662780261256028 |

*Part B: RII_CI_l, RII_CI_u, RII_p, trend_OR_per_year, trend_CI_l, trend_CI_u, trend_p_x*

| **cohort** | **center_year** | **outcome** | **RII_CI_l** | **RII_CI_u** | **RII_p** | **trend_OR_per_year** | **trend_CI_l** | **trend_CI_u** | **trend_p_x** |
| --- | --- | --- | --- | --- | --- | --- | --- | --- | --- |
| CHARLS | 2013 | doctor | 0.7627283822576126 | 4.419753910300152 | 0.1751996590987505 | 0.9672943124444436 | 0.7245979369659727 | 1.2912792586812287 | 0.8215066303329456 |
| HRS | 2013 | doctor | 4.951863059804006 | 8.085818474323245 | 3.121073485961734e-49 | 1.0506942042113585 | 1.0137718971508196 | 1.0889612484484792 | 0.0067403175627326 |
| MHAS | 2013 | doctor | 0.7530602967863066 | 4.7599915964918535 | 0.1747650161513568 | 1.0572367565476537 | 0.8090922465632601 | 1.3814859358042422 | 0.6834093106672043 |
| SHARE | 2013 | doctor | 1.1764481692660735 | 1.8275103876782368 | 0.0006586629848087 | 1.0373663786714569 | 0.989704628078827 | 1.0873234024244878 | 0.1263272174643117 |

*Part C: recall_window, system_label, SII_abs_diff, SII_CI_l, SII_CI_u, trend_abs_diff_per_year, trend_p_y*

| **cohort** | **center_year** | **outcome** | **recall_window** | **system_label** | **SII_abs_diff** | **SII_CI_l** | **SII_CI_u** | **trend_abs_diff_per_year** | **trend_p_y** |
| --- | --- | --- | --- | --- | --- | --- | --- | --- | --- |
| CHARLS | 2013 | doctor | past month | coverage expansion | 0.1232237333456926 | -0.0655255965489223 | 0.3119730632403076 | -0.0093192861592047 | 0.7520689217983807 |
| HRS | 2013 | doctor | since previous interview / recent period | market-based | 0.0984548329436014 | 0.0841755583425861 | 0.1127341075446166 | 0.0060922142465952 | 1.7906284626213057e-12 |
| MHAS | 2013 | doctor | past year | coverage expansion | 0.0812163765104345 | -0.026377935450106 | 0.1888106884709751 | 0.0057770248418918 | 0.7052470927985193 |
| SHARE | 2013 | doctor | past year | universal / UHC | 0.0178859808558632 | 0.0077983469070333 | 0.0279736148046931 | 0.0017331715414138 | 0.121623228118849 |

### Supplementary Table S11. healthcare variable definitions

| **cohort** | **doctor_variable** | **hospital_variable** | **recall_window** | **year_variable** | **weight_variable** |
| --- | --- | --- | --- | --- | --- |
| CHARLS | doctor | hospital | past month | iwy | mweight |
| HRS | doctor | hosp | recent / since previous interview | iwendy | wtresp |
| MHAS | doctor1y | hosp1y | past year | iwy | weight |
| SHARE | doctor1y | hosp1y | past year | iwy | weight |

### Supplementary Table S12. external health system evidence

| **setting** | **health_system_context** | **external_evidence_needed** | **study_result** | **citation_status** |
| --- | --- | --- | --- | --- |
| USA | Market-based + Medicare gaps | High OOP/insurance-linked access | HRS RII largest and widening | formal references required |
| Europe | Universal coverage | Residual SES gradients | SHARE smaller, stable gradient | formal references required |
| Mexico | Coverage expansion | Seguro Popular period relevant | MHAS imprecise, no clear gradient | formal references required |
| China | Broad insurance expansion | Residual reimbursement depth gaps | CHARLS imprecise; any-care sensitivity positive | formal references required |

### Supplementary Table S13. high need profile

*Part A: n_personwaves, n_persons, events, rate_limited_walk, rate_no_limited_walk, OR_limited_vs_no, OR_CI_l*

| **marker** | **label** | **n_personwaves** | **n_persons** | **events** | **rate_limited_walk** | **rate_no_limited_walk** | **OR_limited_vs_no** | **OR_CI_l** |
| --- | --- | --- | --- | --- | --- | --- | --- | --- |
| multimorbidity2 | Multimorbidity (>=2) | 640878 | 215795 | 196718 | 0.6053869227635753 | 0.2637680020433424 | 3.0530163744442516 | 2.981637681652278 |
| arthritis | Arthritis | 640287 | 215729 | 258336 | 0.6628490239683716 | 0.3659356356608688 | 2.4601550562819012 | 2.4031795556604414 |
| fall | Recent fall | 551775 | 203676 | 99525 | 0.3828551385478779 | 0.1503371488033298 | 2.919565255079552 | 2.848100863863818 |
| high_depressive | High depressive symptoms | 624340 | 213748 | 183374 | 0.5951120546031063 | 0.2529150118564425 | 4.086667932201342 | 4.004979806504851 |
| adl_any | Any ADL limitation | 319254 | 80705 | 58630 | 0.6735301470421127 | 0.1053358183198729 | 15.869866592760768 | 15.37294944760054 |
| iadl_any | Any IADL limitation | 303950 | 80495 | 51436 | 0.5686904043452021 | 0.1061917912579754 | 10.91043822203087 | 10.554019154005791 |
| hospital | Hospitalisation | 642425 | 216099 | 117098 | 0.3899039950449055 | 0.1524354637706961 | 2.863620738140018 | 2.8087281071924384 |

*Part B: OR_CI_u, OR_p, abs_diff_limited_vs_no, abs_diff_CI_l, abs_diff_CI_u, abs_diff_p*

| **marker** | **label** | **OR_CI_u** | **OR_p** | **abs_diff_limited_vs_no** | **abs_diff_CI_l** | **abs_diff_CI_u** | **abs_diff_p** |
| --- | --- | --- | --- | --- | --- | --- | --- |
| multimorbidity2 | Multimorbidity (>=2) | 3.126103832126085 | 0.0 | 0.2507438501686394 | 0.2455137531343012 | 0.2559739472029776 | 0.0 |
| arthritis | Arthritis | 2.5184813538770703 | 0.0 | 0.1960638451985197 | 0.1910687369842412 | 0.2010589534127981 | 0.0 |
| fall | Recent fall | 2.992822826893851 | 0.0 | 0.176686910445362 | 0.1724881462417859 | 0.1808856746489382 | 0.0 |
| high_depressive | High depressive symptoms | 4.170022221075228 | 0.0 | 0.3242374373859351 | 0.319639438897733 | 0.3288354358741372 | 0.0 |
| adl_any | Any ADL limitation | 16.382846150016725 | 0.0 | 0.5454986643660653 | 0.5395148107499759 | 0.5514825179821548 | 0.0 |
| iadl_any | Any IADL limitation | 11.278893894329462 | 0.0 | 0.4376657239851177 | 0.4312322874198349 | 0.4440991605504005 | 0.0 |
| hospital | Hospitalisation | 2.9195861681686592 | 0.0 | 0.1998630674528249 | 0.1958210057582639 | 0.2039051291473858 | 0.0 |

### Supplementary Table S14. health system minimal RII

*Part A: limited_definition, adjustment, n_personwaves, n_persons, events, rate, RII*

| **cohort** | **outcome** | **label** | **limited_definition** | **adjustment** | **n_personwaves** | **n_persons** | **events** | **rate** | **RII** |
| --- | --- | --- | --- | --- | --- | --- | --- | --- | --- |
| CHARLS | doctor | Doctor contact | limited_walk | minimal | 4547 | 3259 | 1111 | 0.2443369254453485 | 1.8360478615711495 |
| CHARLS | hospital | Hospitalisation | limited_walk | minimal | 4548 | 3258 | 1437 | 0.3159630606860158 | 4.27127380620579 |
| CHARLS | any_care | Any care | limited_walk | minimal | 4556 | 3262 | 2062 | 0.4525899912203687 | 3.370547473947057 |
| CHARLS | any_oop | Any OOP payment | limited_walk | minimal | 4530 | 3248 | 1858 | 0.4101545253863135 | 2.481100301486586 |
| CHARLS | insurance_any | Insurance coverage | limited_walk | minimal | 4445 | 3193 | 4092 | 0.9205849268841396 | 0.7749547423663069 |
| HRS | doctor | Doctor contact | limited_walk | minimal | 33484 | 13542 | 31876 | 0.9519770636722016 | 6.3277062045643415 |
| HRS | hospital | Hospitalisation | limited_walk | minimal | 33405 | 13545 | 16543 | 0.4952252656787906 | 1.0675680609363938 |
| HRS | any_care | Any care | limited_walk | minimal | 33530 | 13556 | 32320 | 0.9639129138085296 | 5.560511351581061 |
| HRS | any_oop | Any OOP payment | limited_walk | minimal | 33616 | 13591 | 27142 | 0.8074131366016183 | 5.506699526654062 |
| HRS | insurance_any | Insurance coverage | limited_walk | minimal | 33525 | 13553 | 32021 | 0.955137956748695 | 2.93127822627651 |
| MHAS | doctor | Doctor contact | limited_walk | minimal | 5761 | 4194 | 4860 | 0.8436035410519007 | 1.8932936075407003 |
| MHAS | hospital | Hospitalisation | limited_walk | minimal | 5767 | 4194 | 1449 | 0.251257152765736 | 1.7506223731919648 |
| MHAS | any_care | Any care | limited_walk | minimal | 5777 | 4199 | 4957 | 0.8580578154751601 | 2.448605470499992 |
| MHAS | any_oop | Any OOP payment | limited_walk | minimal | 5783 | 4205 | 2475 | 0.4279785578419505 | 2.665404246275206 |
| MHAS | insurance_any | Insurance coverage | limited_walk | minimal | 5778 | 4200 | 5293 | 0.916060920733818 | 2.618739792269288 |
| SHARE | doctor | Doctor contact | limited_walk | minimal | 35798 | 24289 | 33960 | 0.9486563495167328 | 1.4662780261256028 |
| SHARE | hospital | Hospitalisation | limited_walk | minimal | 36969 | 24826 | 12035 | 0.325543022532392 | 1.2375358161104446 |
| SHARE | any_care | Any care | limited_walk | minimal | 36991 | 24842 | 34673 | 0.9373361087832176 | 1.5578967409325348 |
| SHARE | any_oop | Any OOP payment | limited_walk | minimal | 23291 | 17240 | 19381 | 0.8321239963934567 | 3.258499391400825 |

*Part B: RII_CI_l, RII_CI_u, RII_p, trend_OR_per_year, trend_CI_l, trend_CI_u, trend_p*

| **cohort** | **outcome** | **label** | **RII_CI_l** | **RII_CI_u** | **RII_p** | **trend_OR_per_year** | **trend_CI_l** | **trend_CI_u** | **trend_p** |
| --- | --- | --- | --- | --- | --- | --- | --- | --- | --- |
| CHARLS | doctor | Doctor contact | 0.7627283822576126 | 4.419753910300152 | 0.1751996590987505 | 0.9672943124444436 | 0.7245979369659727 | 1.2912792586812287 | 0.8215066303329456 |
| CHARLS | hospital | Hospitalisation | 1.8971650589470657 | 9.616337725355889 | 0.0004539516229676 | 0.8713645660421141 | 0.6915704505052627 | 1.0979014594956062 | 0.2428723804935323 |
| CHARLS | any_care | Any care | 1.5008698989745652 | 7.56933714367431 | 0.0032430794466864 | 0.978784626775153 | 0.7745436166885926 | 1.2368823717212942 | 0.857478684236003 |
| CHARLS | any_oop | Any OOP payment | 1.1421356138377043 | 5.389779139582601 | 0.0216895823149999 | 1.1324917754596968 | 0.8919085822916013 | 1.4379698177010507 | 0.3071814079762048 |
| CHARLS | insurance_any | Insurance coverage | 0.2110525516902677 | 2.8455228231373355 | 0.7008442901167334 | 1.6501694714564823 | 0.933563672196312 | 2.916843666507146 | 0.0848064800688367 |
| HRS | doctor | Doctor contact | 4.951863059804006 | 8.085818474323245 | 3.121073485961734e-49 | 1.0506942042113585 | 1.0137718971508196 | 1.0889612484484792 | 0.0067403175627326 |
| HRS | hospital | Hospitalisation | 0.9519355351405382 | 1.1972465809496573 | 0.2636330470311954 | 1.0051324334776284 | 0.9899865706535146 | 1.0205100137487124 | 0.5087076979916161 |
| HRS | any_care | Any care | 4.198845329090391 | 7.363759335655258 | 4.9704065790204736e-33 | 1.0418319167428844 | 0.9985992141049084 | 1.086936307792972 | 0.0580693044352979 |
| HRS | any_oop | Any OOP payment | 4.695157238485905 | 6.458514195923047 | 1.1747984954553935e-97 | 0.9703770169331676 | 0.94877988452451 | 0.9924657661392354 | 0.0088298983488013 |
| HRS | insurance_any | Insurance coverage | 2.143254114428818 | 4.009040263586593 | 1.674167437106221e-11 | 1.0029167291863617 | 0.9643278799001253 | 1.0430497620643762 | 0.8843247319662773 |
| MHAS | doctor | Doctor contact | 0.7530602967863066 | 4.7599915964918535 | 0.1747650161513568 | 1.0572367565476537 | 0.8090922465632601 | 1.3814859358042422 | 0.6834093106672043 |
| MHAS | hospital | Hospitalisation | 0.8855093357483927 | 3.4609219460460436 | 0.1073253552433296 | 0.937322326018178 | 0.77407840842513 | 1.1349924417083186 | 0.5073330348647755 |
| MHAS | any_care | Any care | 0.889083975124443 | 6.743647302070974 | 0.0831755200571417 | 1.0353671699016305 | 0.7757572221094119 | 1.381856521548336 | 0.8134449032422535 |
| MHAS | any_oop | Any OOP payment | 1.4124331259761402 | 5.029887550358904 | 0.0024799244805941 | 0.9914611375953208 | 0.8286292695145323 | 1.1862906893666856 | 0.9253580651639144 |
| MHAS | insurance_any | Insurance coverage | 0.7590324078958175 | 9.034921339690513 | 0.1275993115363511 | 0.8800355342530483 | 0.6065760775043204 | 1.2767772588963204 | 0.5008971288576171 |
| SHARE | doctor | Doctor contact | 1.1764481692660735 | 1.8275103876782368 | 0.0006586629848087 | 1.0373663786714569 | 0.989704628078827 | 1.0873234024244878 | 0.1263272174643117 |
| SHARE | hospital | Hospitalisation | 1.1241648631748613 | 1.362340121386558 | 1.3767156285024576e-05 | 0.9892480811943888 | 0.9685982338505926 | 1.0103381690635338 | 0.315190003643811 |
| SHARE | any_care | Any care | 1.2755584202872183 | 1.9027292022122475 | 1.3881380794664484e-05 | 1.02223553290742 | 0.979300455587457 | 1.0670529956117187 | 0.3151109658947715 |
| SHARE | any_oop | Any OOP payment | 2.733247894874581 | 3.884689092295729 | 1.2757552958984766e-39 | 0.9606450836608894 | 0.9221998230430156 | 1.000693075082917 | 0.0540105607351228 |

*Part C: recall_window, system_label*

| **cohort** | **outcome** | **label** | **recall_window** | **system_label** |
| --- | --- | --- | --- | --- |
| CHARLS | doctor | Doctor contact | outpatient past month; inpatient past year | coverage expansion |
| CHARLS | hospital | Hospitalisation | outpatient past month; inpatient past year | coverage expansion |
| CHARLS | any_care | Any care | outpatient past month; inpatient past year | coverage expansion |
| CHARLS | any_oop | Any OOP payment | outpatient past month; inpatient past year | coverage expansion |
| CHARLS | insurance_any | Insurance coverage | outpatient past month; inpatient past year | coverage expansion |
| HRS | doctor | Doctor contact | since previous interview / recent period | market-based with Medicare/Medicaid |
| HRS | hospital | Hospitalisation | since previous interview / recent period | market-based with Medicare/Medicaid |
| HRS | any_care | Any care | since previous interview / recent period | market-based with Medicare/Medicaid |
| HRS | any_oop | Any OOP payment | since previous interview / recent period | market-based with Medicare/Medicaid |
| HRS | insurance_any | Insurance coverage | since previous interview / recent period | market-based with Medicare/Medicaid |
| MHAS | doctor | Doctor contact | past year | coverage expansion |
| MHAS | hospital | Hospitalisation | past year | coverage expansion |
| MHAS | any_care | Any care | past year | coverage expansion |
| MHAS | any_oop | Any OOP payment | past year | coverage expansion |
| MHAS | insurance_any | Insurance coverage | past year | coverage expansion |
| SHARE | doctor | Doctor contact | past year | universal / UHC |
| SHARE | hospital | Hospitalisation | past year | universal / UHC |
| SHARE | any_care | Any care | past year | universal / UHC |
| SHARE | any_oop | Any OOP payment | past year | universal / UHC |

### Supplementary Table S15. health system need adjusted RII

*Part A: limited_definition, adjustment, n_personwaves, n_persons, events, rate, RII*

| **cohort** | **outcome** | **label** | **limited_definition** | **adjustment** | **n_personwaves** | **n_persons** | **events** | **rate** | **RII** |
| --- | --- | --- | --- | --- | --- | --- | --- | --- | --- |
| CHARLS | doctor | Doctor contact | limited_walk | need_adjusted | 3481 | 2603 | 857 | 0.2461936225222637 | 1.8221381071800935 |
| CHARLS | hospital | Hospitalisation | limited_walk | need_adjusted | 3481 | 2602 | 1028 | 0.2953174375179546 | 3.380084805303389 |
| CHARLS | any_care | Any care | limited_walk | need_adjusted | 3485 | 2604 | 1534 | 0.4401721664275466 | 3.0303667709539557 |
| CHARLS | any_oop | Any OOP payment | limited_walk | need_adjusted | 3471 | 2597 | 1404 | 0.4044943820224719 | 2.2272715268601972 |
| CHARLS | insurance_any | Insurance coverage | limited_walk | need_adjusted | 3441 | 2576 | 3179 | 0.923859343214182 | 0.5590778136729724 |
| HRS | doctor | Doctor contact | limited_walk | need_adjusted | 18004 | 8014 | 17190 | 0.9547878249277938 | 8.211299836321494 |
| HRS | hospital | Hospitalisation | limited_walk | need_adjusted | 17943 | 8012 | 8913 | 0.4967396756395251 | 1.2704438999608036 |
| HRS | any_care | Any care | limited_walk | need_adjusted | 18025 | 8023 | 17430 | 0.966990291262136 | 7.453082849083911 |
| HRS | any_oop | Any OOP payment | limited_walk | need_adjusted | 18066 | 8041 | 15377 | 0.8511568692571682 | 5.963848881325302 |
| HRS | insurance_any | Insurance coverage | limited_walk | need_adjusted | 18021 | 8019 | 17855 | 0.9907885244991954 | 4.905674461497155 |
| MHAS | doctor | Doctor contact | limited_walk | need_adjusted | 5749 | 4189 | 4851 | 0.8437989215515742 | 1.9059440667907737 |
| MHAS | hospital | Hospitalisation | limited_walk | need_adjusted | 5755 | 4189 | 1446 | 0.25125977410947 | 1.6398366822018584 |
| MHAS | any_care | Any care | limited_walk | need_adjusted | 5765 | 4194 | 4948 | 0.8582827406764961 | 2.526370051442054 |
| MHAS | any_oop | Any OOP payment | limited_walk | need_adjusted | 5771 | 4200 | 2471 | 0.4281753595564027 | 2.7684073896213772 |
| MHAS | insurance_any | Insurance coverage | limited_walk | need_adjusted | 5766 | 4195 | 5282 | 0.9160596600763092 | 2.409624122111609 |
| SHARE | doctor | Doctor contact | limited_walk | need_adjusted | 33786 | 23232 | 32076 | 0.9493873201917954 | 1.50687148860935 |
| SHARE | hospital | Hospitalisation | limited_walk | need_adjusted | 34773 | 23710 | 11322 | 0.3255974462945388 | 1.4327741614657368 |
| SHARE | any_care | Any care | limited_walk | need_adjusted | 34789 | 23722 | 32699 | 0.9399235390496996 | 1.650608816753219 |
| SHARE | any_oop | Any OOP payment | limited_walk | need_adjusted | 21905 | 16442 | 18237 | 0.8325496461994978 | 3.263911613546829 |

*Part B: RII_CI_l, RII_CI_u, RII_p, trend_OR_per_year, trend_CI_l, trend_CI_u, trend_p*

| **cohort** | **outcome** | **label** | **RII_CI_l** | **RII_CI_u** | **RII_p** | **trend_OR_per_year** | **trend_CI_l** | **trend_CI_u** | **trend_p** |
| --- | --- | --- | --- | --- | --- | --- | --- | --- | --- |
| CHARLS | doctor | Doctor contact | 0.6363809917792469 | 5.217294866641127 | 0.2635994564830261 | 1.052049255123721 | 0.753665575857517 | 1.4685659935403783 | 0.7655809290488895 |
| CHARLS | hospital | Hospitalisation | 1.1441198256695178 | 9.985818823091511 | 0.0275523287509044 | 0.881679737282524 | 0.6647258923137862 | 1.1694431766885731 | 0.3822130378196352 |
| CHARLS | any_care | Any care | 1.0342392659297894 | 8.879108605730803 | 0.0432403400322495 | 1.018836844154942 | 0.7664065130769508 | 1.3544098298958205 | 0.8977746917801835 |
| CHARLS | any_oop | Any OOP payment | 0.8267887494932891 | 6.000007205471076 | 0.1132383051108523 | 1.2232178067511716 | 0.928185525691257 | 1.6120288038739026 | 0.1524902503957305 |
| CHARLS | insurance_any | Insurance coverage | 0.1133682481377702 | 2.757103570670901 | 0.475079008348351 | 1.4731708908586876 | 0.8632553222528272 | 2.5140099547950068 | 0.1553890001920267 |
| HRS | doctor | Doctor contact | 5.769767006294896 | 11.6859909470194 | 1.3574855944624239e-31 | 1.0618546472433186 | 1.007250890948688 | 1.119418510327902 | 0.0258651980155058 |
| HRS | hospital | Hospitalisation | 1.0846600667335466 | 1.4880493460114748 | 0.0030025003825667 | 1.0043266058112008 | 0.9834997723763996 | 1.0255944734008682 | 0.6863539276051102 |
| HRS | any_care | Any care | 4.9339954929667496 | 11.258308613068504 | 1.3674031907205588e-21 | 1.045769992263046 | 0.9806755645608416 | 1.1151852011399856 | 0.1722909681653331 |
| HRS | any_oop | Any OOP payment | 4.689838059135811 | 7.583949174961283 | 4.7554851968749014e-48 | 0.9657875352234742 | 0.9326215528991496 | 1.0001329695775294 | 0.0508738485499914 |
| HRS | insurance_any | Insurance coverage | 2.123081660240978 | 11.33524083075253 | 0.000197739514154 | 1.0283455375357464 | 0.9105495042827274 | 1.1613806164253635 | 0.6524839766921293 |
| MHAS | doctor | Doctor contact | 0.7314745397463872 | 4.966164354803702 | 0.1868242133037062 | 1.0582753172014217 | 0.807978060536298 | 1.3861102196938386 | 0.6807937792469666 |
| MHAS | hospital | Hospitalisation | 0.8108091932433058 | 3.316519307752682 | 0.168704628101539 | 0.9138665316454208 | 0.7489743439913068 | 1.1150609421560165 | 0.3749610148201536 |
| MHAS | any_care | Any care | 0.8900312312098241 | 7.171147947412473 | 0.0816598395920797 | 1.034657082404104 | 0.7729220873559344 | 1.3850235304195615 | 0.8188952517724924 |
| MHAS | any_oop | Any OOP payment | 1.4594926440233298 | 5.251194314883946 | 0.0018235137663538 | 0.9875568519791612 | 0.8254463550576894 | 1.1815044429178332 | 0.8911359987831245 |
| MHAS | insurance_any | Insurance coverage | 0.6882059385664289 | 8.436847293060216 | 0.1689588118174623 | 0.8886556961089087 | 0.6128426137670662 | 1.288599925146471 | 0.5335301088853512 |
| SHARE | doctor | Doctor contact | 1.1971063595534042 | 1.896791930861396 | 0.0004789379197588 | 1.0500397208937882 | 1.0012495645369646 | 1.1012073857576183 | 0.0442786844805499 |
| SHARE | hospital | Hospitalisation | 1.293896419950325 | 1.5865580630037277 | 4.735306939202479e-12 | 0.9856851454760596 | 0.9641245926563984 | 1.0077278532385885 | 0.201328355506501 |
| SHARE | any_care | Any care | 1.3371171165380686 | 2.037599722750907 | 3.110375832539927e-06 | 1.0331447731364447 | 0.9884470021911256 | 1.0798637862151823 | 0.1484482971923322 |
| SHARE | any_oop | Any OOP payment | 2.7177661568452742 | 3.919807079138767 | 9.65584178632563e-37 | 0.9535284984486272 | 0.9140890637468676 | 0.9946695933838204 | 0.0272447709933708 |

*Part C: recall_window, system_label*

| **cohort** | **outcome** | **label** | **recall_window** | **system_label** |
| --- | --- | --- | --- | --- |
| CHARLS | doctor | Doctor contact | outpatient past month; inpatient past year | coverage expansion |
| CHARLS | hospital | Hospitalisation | outpatient past month; inpatient past year | coverage expansion |
| CHARLS | any_care | Any care | outpatient past month; inpatient past year | coverage expansion |
| CHARLS | any_oop | Any OOP payment | outpatient past month; inpatient past year | coverage expansion |
| CHARLS | insurance_any | Insurance coverage | outpatient past month; inpatient past year | coverage expansion |
| HRS | doctor | Doctor contact | since previous interview / recent period | market-based with Medicare/Medicaid |
| HRS | hospital | Hospitalisation | since previous interview / recent period | market-based with Medicare/Medicaid |
| HRS | any_care | Any care | since previous interview / recent period | market-based with Medicare/Medicaid |
| HRS | any_oop | Any OOP payment | since previous interview / recent period | market-based with Medicare/Medicaid |
| HRS | insurance_any | Insurance coverage | since previous interview / recent period | market-based with Medicare/Medicaid |
| MHAS | doctor | Doctor contact | past year | coverage expansion |
| MHAS | hospital | Hospitalisation | past year | coverage expansion |
| MHAS | any_care | Any care | past year | coverage expansion |
| MHAS | any_oop | Any OOP payment | past year | coverage expansion |
| MHAS | insurance_any | Insurance coverage | past year | coverage expansion |
| SHARE | doctor | Doctor contact | past year | universal / UHC |
| SHARE | hospital | Hospitalisation | past year | universal / UHC |
| SHARE | any_care | Any care | past year | universal / UHC |
| SHARE | any_oop | Any OOP payment | past year | universal / UHC |

### Supplementary Table S16. need adjustment comparison

*Part A: n_personwaves_minimal, RII_minimal, RII_CI_l_minimal, RII_CI_u_minimal, RII_p_minimal, n_personwaves_need_adjusted, RII_need_adjusted*

| **cohort** | **outcome** | **label** | **n_personwaves_minimal** | **RII_minimal** | **RII_CI_l_minimal** | **RII_CI_u_minimal** | **RII_p_minimal** | **n_personwaves_need_adjusted** | **RII_need_adjusted** |
| --- | --- | --- | --- | --- | --- | --- | --- | --- | --- |
| CHARLS | doctor | Doctor contact | 4547 | 1.8360478615711495 | 0.7627283822576126 | 4.419753910300152 | 0.1751996590987505 | 3481 | 1.8221381071800935 |
| CHARLS | hospital | Hospitalisation | 4548 | 4.27127380620579 | 1.8971650589470657 | 9.616337725355889 | 0.0004539516229676 | 3481 | 3.380084805303389 |
| CHARLS | any_care | Any care | 4556 | 3.370547473947057 | 1.5008698989745652 | 7.56933714367431 | 0.0032430794466864 | 3485 | 3.0303667709539557 |
| CHARLS | any_oop | Any OOP payment | 4530 | 2.481100301486586 | 1.1421356138377043 | 5.389779139582601 | 0.0216895823149999 | 3471 | 2.2272715268601972 |
| CHARLS | insurance_any | Insurance coverage | 4445 | 0.7749547423663069 | 0.2110525516902677 | 2.8455228231373355 | 0.7008442901167334 | 3441 | 0.5590778136729724 |
| HRS | doctor | Doctor contact | 33484 | 6.3277062045643415 | 4.951863059804006 | 8.085818474323245 | 3.121073485961734e-49 | 18004 | 8.211299836321494 |
| HRS | hospital | Hospitalisation | 33405 | 1.0675680609363938 | 0.9519355351405382 | 1.1972465809496573 | 0.2636330470311954 | 17943 | 1.2704438999608036 |
| HRS | any_care | Any care | 33530 | 5.560511351581061 | 4.198845329090391 | 7.363759335655258 | 4.9704065790204736e-33 | 18025 | 7.453082849083911 |
| HRS | any_oop | Any OOP payment | 33616 | 5.506699526654062 | 4.695157238485905 | 6.458514195923047 | 1.1747984954553935e-97 | 18066 | 5.963848881325302 |
| HRS | insurance_any | Insurance coverage | 33525 | 2.93127822627651 | 2.143254114428818 | 4.009040263586593 | 1.674167437106221e-11 | 18021 | 4.905674461497155 |
| MHAS | doctor | Doctor contact | 5761 | 1.8932936075407003 | 0.7530602967863066 | 4.7599915964918535 | 0.1747650161513568 | 5749 | 1.9059440667907737 |
| MHAS | hospital | Hospitalisation | 5767 | 1.7506223731919648 | 0.8855093357483927 | 3.4609219460460436 | 0.1073253552433296 | 5755 | 1.6398366822018584 |
| MHAS | any_care | Any care | 5777 | 2.448605470499992 | 0.889083975124443 | 6.743647302070974 | 0.0831755200571417 | 5765 | 2.526370051442054 |
| MHAS | any_oop | Any OOP payment | 5783 | 2.665404246275206 | 1.4124331259761402 | 5.029887550358904 | 0.0024799244805941 | 5771 | 2.7684073896213772 |
| MHAS | insurance_any | Insurance coverage | 5778 | 2.618739792269288 | 0.7590324078958175 | 9.034921339690513 | 0.1275993115363511 | 5766 | 2.409624122111609 |
| SHARE | doctor | Doctor contact | 35798 | 1.4662780261256028 | 1.1764481692660735 | 1.8275103876782368 | 0.0006586629848087 | 33786 | 1.50687148860935 |
| SHARE | hospital | Hospitalisation | 36969 | 1.2375358161104446 | 1.1241648631748613 | 1.362340121386558 | 1.3767156285024576e-05 | 34773 | 1.4327741614657368 |
| SHARE | any_care | Any care | 36991 | 1.5578967409325348 | 1.2755584202872183 | 1.9027292022122475 | 1.3881380794664484e-05 | 34789 | 1.650608816753219 |
| SHARE | any_oop | Any OOP payment | 23291 | 3.258499391400825 | 2.733247894874581 | 3.884689092295729 | 1.2757552958984766e-39 | 21905 | 3.263911613546829 |

*Part B: RII_CI_l_need_adjusted, RII_CI_u_need_adjusted, RII_p_need_adjusted, SII_abs_diff_minimal, SII_CI_l_minimal, SII_CI_u_minimal, SII_p_minimal*

| **cohort** | **outcome** | **label** | **RII_CI_l_need_adjusted** | **RII_CI_u_need_adjusted** | **RII_p_need_adjusted** | **SII_abs_diff_minimal** | **SII_CI_l_minimal** | **SII_CI_u_minimal** | **SII_p_minimal** |
| --- | --- | --- | --- | --- | --- | --- | --- | --- | --- |
| CHARLS | doctor | Doctor contact | 0.6363809917792469 | 5.217294866641127 | 0.2635994564830261 | 0.1232237333456926 | -0.0655255965489223 | 0.3119730632403076 | 0.2006954046167226 |
| CHARLS | hospital | Hospitalisation | 1.1441198256695178 | 9.985818823091511 | 0.0275523287509044 | 0.3321443168553771 | 0.1340536652437655 | 0.5302349684669887 | 0.0010148090154439 |
| CHARLS | any_care | Any care | 1.0342392659297894 | 8.879108605730803 | 0.0432403400322495 | 0.3009485435706475 | 0.1052278319388433 | 0.4966692552024516 | 0.0025801492132739 |
| CHARLS | any_oop | Any OOP payment | 0.8267887494932891 | 6.000007205471076 | 0.1132383051108523 | 0.223588885443126 | 0.0316181563697169 | 0.4155596145165351 | 0.0224410974695795 |
| CHARLS | insurance_any | Insurance coverage | 0.1133682481377702 | 2.757103570670901 | 0.475079008348351 | -0.0196057526923675 | -0.1326039888777953 | 0.0933924834930602 | 0.7338040459543291 |
| HRS | doctor | Doctor contact | 5.769767006294896 | 11.6859909470194 | 1.3574855944624239e-31 | 0.0984548329436014 | 0.0841755583425861 | 0.1127341075446166 | 1.2913404166130294e-41 |
| HRS | hospital | Hospitalisation | 1.0846600667335466 | 1.4880493460114748 | 0.0030025003825667 | 0.0162150531117439 | -0.0121932965012416 | 0.0446234027247296 | 0.2632518705835264 |
| HRS | any_care | Any care | 4.9339954929667496 | 11.258308613068504 | 1.3674031907205588e-21 | 0.070280514348636 | 0.0577105386835542 | 0.0828504900137177 | 6.040179700895526e-28 |
| HRS | any_oop | Any OOP payment | 4.689838059135811 | 7.583949174961283 | 4.7554851968749014e-48 | 0.2681022071005082 | 0.2421861319647226 | 0.2940182822362938 | 2.0850928786452347e-91 |
| HRS | insurance_any | Insurance coverage | 2.123081660240978 | 11.33524083075253 | 0.000197739514154 | 0.0417919376185061 | 0.0283730379722903 | 0.055210837264722 | 1.0329031818910223e-09 |
| MHAS | doctor | Doctor contact | 0.7314745397463872 | 4.966164354803702 | 0.1868242133037062 | 0.0812163765104345 | -0.026377935450106 | 0.1888106884709751 | 0.1390109177998366 |
| MHAS | hospital | Hospitalisation | 0.8108091932433058 | 3.316519307752682 | 0.168704628101539 | 0.1108572551135714 | -0.03165913323913 | 0.2533736434662729 | 0.1273593626343245 |
| MHAS | any_care | Any care | 0.8900312312098241 | 7.171147947412473 | 0.0816598395920797 | 0.1016599399339024 | 0.0015059038686464 | 0.2018139759991584 | 0.0466493145464126 |
| MHAS | any_oop | Any OOP payment | 1.4594926440233298 | 5.251194314883946 | 0.0018235137663538 | 0.2412144928175806 | 0.083472667263168 | 0.3989563183719933 | 0.0027249112172676 |
| MHAS | insurance_any | Insurance coverage | 0.6882059385664289 | 8.436847293060216 | 0.1689588118174623 | 0.0728288106264513 | -0.0048427766878013 | 0.150500397940704 | 0.0660925920869304 |
| SHARE | doctor | Doctor contact | 1.1971063595534042 | 1.896791930861396 | 0.0004789379197588 | 0.0178859808558632 | 0.0077983469070333 | 0.0279736148046931 | 0.0005104769523679 |
| SHARE | hospital | Hospitalisation | 1.293896419950325 | 1.5865580630037277 | 4.735306939202479e-12 | 0.0470741652230412 | 0.0257161604326043 | 0.0684321700134781 | 1.560694895212087e-05 |
| SHARE | any_care | Any care | 1.3371171165380686 | 2.037599722750907 | 3.110375832539927e-06 | 0.0248727801759617 | 0.0142149456897169 | 0.0355306146622065 | 4.7813244192144315e-06 |
| SHARE | any_oop | Any OOP payment | 2.7177661568452742 | 3.919807079138767 | 9.65584178632563e-37 | 0.1451474568501951 | 0.1259280332956352 | 0.164366880404755 | 1.4184946823871169e-49 |

*Part C: SII_abs_diff_need_adjusted, SII_CI_l_need_adjusted, SII_CI_u_need_adjusted, SII_p_need_adjusted, RII_percent_change_after_need_adjustment, SII_pp_change_after_need_adjustment*

| **cohort** | **outcome** | **label** | **SII_abs_diff_need_adjusted** | **SII_CI_l_need_adjusted** | **SII_CI_u_need_adjusted** | **SII_p_need_adjusted** | **RII_percent_change_after_need_adjustment** | **SII_pp_change_after_need_adjustment** |
| --- | --- | --- | --- | --- | --- | --- | --- | --- |
| CHARLS | doctor | Doctor contact | 0.1247560612061224 | -0.0966355658679982 | 0.3461476882802431 | 0.2693864322213565 | -0.7575921457272594 | 0.1532327860429838 |
| CHARLS | hospital | Hospitalisation | 0.2662702170474032 | 0.0214166429690711 | 0.5111237911257352 | 0.0330532723644047 | -20.86471252691834 | -6.587409980797387 |
| CHARLS | any_care | Any care | 0.2601914404456371 | 0.0173922468633186 | 0.5029906340279555 | 0.0356937424837358 | -10.09274325973919 | -4.075710312501041 |
| CHARLS | any_oop | Any OOP payment | 0.1915132719539688 | -0.0393284754253596 | 0.4223550193332973 | 0.1039336843549606 | -10.230492272896177 | -3.207561348915719 |
| CHARLS | insurance_any | Insurance coverage | -0.0482475632111511 | -0.1845031174538078 | 0.0880079910315055 | 0.4876644006243421 | -27.85671432039491 | -2.8641810518783637 |
| HRS | doctor | Doctor contact | 0.1076868111995707 | 0.0877742559826647 | 0.1275993664164767 | 2.990920064760227e-26 | 29.76740023736353 | 0.9231978255969344 |
| HRS | hospital | Hospitalisation | 0.0559497181576599 | 0.0189765511553444 | 0.0929228851599754 | 0.003017261138355 | 19.00355082246108 | 3.9734665045915967 |
| HRS | any_care | Any care | 0.0763512645661528 | 0.0589486208865702 | 0.0937539082457354 | 8.028715262534283e-18 | 34.035925436330984 | 0.6070750217516809 |
| HRS | any_oop | Any OOP payment | 0.2329250325830829 | 0.2002208485578942 | 0.2656292166082716 | 2.754761571995106e-44 | 8.301694190113352 | -3.5177174517425303 |
| HRS | insurance_any | Insurance coverage | 0.0176025942694348 | 0.0068933084111273 | 0.0283118801277423 | 0.0012747491426338 | 67.35615259997493 | -2.418934334907129 |
| MHAS | doctor | Doctor contact | 0.0771498017806991 | -0.0329579030501804 | 0.1872575066115787 | 0.1696514814515562 | 0.6681720785243206 | -0.4066574729735442 |
| MHAS | hospital | Hospitalisation | 0.0965296388007926 | -0.0445799630769941 | 0.2376392406785793 | 0.1799892216655059 | -6.328360284126111 | -1.4327616312778846 |
| MHAS | any_care | Any care | 0.0992279419212489 | -0.0022346303649866 | 0.2006905142074845 | 0.0552592020192137 | 3.175872221104825 | -0.2431998012653563 |
| MHAS | any_oop | Any OOP payment | 0.2497531225692624 | 0.0912307916127925 | 0.4082754535257322 | 0.0020151205446371 | 3.8644473344001673 | 0.8538629751681764 |
| MHAS | insurance_any | Insurance coverage | 0.0647681022122958 | -0.0135801645096067 | 0.1431163689341984 | 0.1051739224884453 | -7.985355046538189 | -0.8060708414155473 |
| SHARE | doctor | Doctor contact | 0.018911920182014 | 0.0085878430725589 | 0.0292359972914691 | 0.0003301957822677 | 2.7684696735863046 | 0.10259393261508 |
| SHARE | hospital | Hospitalisation | 0.076056906518747 | 0.0543434064224282 | 0.0977704066150658 | 6.631218974283243e-12 | 15.776379383420448 | 2.8982741295705794 |
| SHARE | any_care | Any care | 0.0271345784594822 | 0.016415205356835 | 0.0378539515621295 | 6.996417368900517e-07 | 5.951105319418515 | 0.2261798283520535 |
| SHARE | any_oop | Any OOP payment | 0.144462205107737 | 0.1244739281000904 | 0.1644504821153835 | 1.495854092244523e-45 | 0.1660955395691221 | -0.0685251742458148 |

### Supplementary Table S17. unmet need mechanism models

*Part A: source_wave, n_personwaves, n_persons, events, rate, RII, RII_CI_l*

| **cohort** | **mechanism** | **label** | **source_wave** | **n_personwaves** | **n_persons** | **events** | **rate** | **RII** | **RII_CI_l** |
| --- | --- | --- | --- | --- | --- | --- | --- | --- | --- |
| CHARLS | unmet_inpatient | Inpatient need not met | CHARLS 2015 | 1471 | 1471 | 93 | 0.0632222977566281 | 0.95089955536543 | 0.1165322504837731 |
| HRS | couldnt_afford_care | Could not afford care | HRS 2012 | 3397 | 3397 | 417 | 0.1227553723874006 | 0.8028550903501324 | 0.511716171382574 |
| HRS | less_meds_cost | Took less medication due to cost | HRS 2012 | 3391 | 3391 | 580 | 0.1710409908581539 | 0.6105046409631075 | 0.4155556737269852 |
| SHARE | forgo_cost | Forgone care due to cost | SHARE wave 8 | 6358 | 6358 | 827 | 0.1300723497955332 | 0.4138302986335277 | 0.3053351149940395 |
| SHARE | forgo_unavailable | Forgone care due to unavailability | SHARE wave 8 | 6363 | 6363 | 640 | 0.1005814867201005 | 0.9999224500993278 | 0.7224793097603472 |

*Part B: RII_CI_u, RII_p, SII_abs_diff, SII_CI_l, SII_CI_u, SII_p*

| **cohort** | **mechanism** | **label** | **RII_CI_u** | **RII_p** | **SII_abs_diff** | **SII_CI_l** | **SII_CI_u** | **SII_p** |
| --- | --- | --- | --- | --- | --- | --- | --- | --- |
| CHARLS | unmet_inpatient | Inpatient need not met | 7.75931092586324 | 0.962507337896578 | -0.0028014512358938 | -0.1178115668110737 | 0.112208664339286 | 0.9619216429126796 |
| HRS | couldnt_afford_care | Could not afford care | 1.2596363612265344 | 0.3393050351203451 | -0.0173504688095017 | -0.0572233391741729 | 0.0225224015551695 | 0.3937238342683783 |
| HRS | less_meds_cost | Took less medication due to cost | 0.8969097047688545 | 0.0119246092302063 | -0.0558105952283504 | -0.1013341540184565 | -0.0102870364382443 | 0.0162654322477743 |
| SHARE | forgo_cost | Forgone care due to cost | 0.5608772383433783 | 1.2880198950372956e-08 | -0.0933477980108082 | -0.1245575275415947 | -0.0621380684800218 | 4.564211710627658e-09 |
| SHARE | forgo_unavailable | Forgone care due to unavailability | 1.3839080132887127 | 0.999626813764342 | 2.2497002842080532e-05 | -0.0290954279071305 | 0.0291404219128147 | 0.9987917405283158 |

### Supplementary Table S18. standardised response gap

*Part A: scenario, n_personwaves, n_persons, events, observed_event_rate, observed_rate, what_if_rate*

| **cohort** | **outcome** | **label** | **scenario** | **n_personwaves** | **n_persons** | **events** | **observed_event_rate** | **observed_rate** | **what_if_rate** |
| --- | --- | --- | --- | --- | --- | --- | --- | --- | --- |
| CHARLS | any_care | Any care | lower/middle education reach high-education need-adjusted response | 3485 | 2604 | 1534 | 0.4401721664275466 | 0.4401721664275794 | 0.7369063728622233 |
| CHARLS | doctor | Doctor contact | lower/middle education reach high-education need-adjusted response | 3481 | 2603 | 857 | 0.2461936225222637 | 0.2461936225222751 | 0.5050029298091651 |
| CHARLS | hospital | Hospitalisation | lower/middle education reach high-education need-adjusted response | 3481 | 2602 | 1028 | 0.2953174375179546 | 0.2953174375179693 | 0.4393393298087155 |
| HRS | any_care | Any care | lower/middle education reach high-education need-adjusted response | 18025 | 8023 | 17430 | 0.966990291262136 | 0.9669902912621348 | 0.9825800586107348 |
| HRS | doctor | Doctor contact | lower/middle education reach high-education need-adjusted response | 18004 | 8014 | 17190 | 0.9547878249277938 | 0.9547878249277936 | 0.9799732814736049 |
| HRS | hospital | Hospitalisation | lower/middle education reach high-education need-adjusted response | 17943 | 8012 | 8913 | 0.4967396756395251 | 0.4967396756395199 | 0.5082262757049788 |
| MHAS | any_care | Any care | lower/middle education reach high-education need-adjusted response | 5765 | 4194 | 4948 | 0.8582827406764961 | 0.8582827406760777 | 0.9283315042719956 |
| MHAS | doctor | Doctor contact | lower/middle education reach high-education need-adjusted response | 5749 | 4189 | 4851 | 0.8437989215515742 | 0.8437989215515713 | 0.9030986030076212 |
| MHAS | hospital | Hospitalisation | lower/middle education reach high-education need-adjusted response | 5755 | 4189 | 1446 | 0.25125977410947 | 0.2512597741094805 | 0.2838265003894897 |
| SHARE | any_care | Any care | lower/middle education reach high-education need-adjusted response | 34789 | 23722 | 32699 | 0.9399235390496996 | 0.9399235390496904 | 0.9555997872433972 |
| SHARE | doctor | Doctor contact | lower/middle education reach high-education need-adjusted response | 33786 | 23232 | 32076 | 0.9493873201917954 | 0.9493873201917952 | 0.9623293398014918 |
| SHARE | hospital | Hospitalisation | lower/middle education reach high-education need-adjusted response | 34773 | 23710 | 11322 | 0.3255974462945388 | 0.3255974462945386 | 0.35794587965733 |

*Part B: gap_per_1000_all_high_need, gap_per_1000_low_mid_high_need, n_low_mid_personwaves, gap_all_CI_l, gap_all_CI_u, gap_low_mid_CI_l, gap_low_mid_CI_u*

| **cohort** | **outcome** | **label** | **gap_per_1000_all_high_need** | **gap_per_1000_low_mid_high_need** | **n_low_mid_personwaves** | **gap_all_CI_l** | **gap_all_CI_u** | **gap_low_mid_CI_l** | **gap_low_mid_CI_u** |
| --- | --- | --- | --- | --- | --- | --- | --- | --- | --- |
| CHARLS | any_care | Any care | 296.73420643464385 | 298.2747936039036 | 3467 | 74.85676659434064 | 456.7649287988739 | 75.24540858992707 | 459.13636482955735 |
| CHARLS | doctor | Doctor contact | 258.8093072868899 | 260.15454769438753 | 3463 | 52.17691116402459 | 449.1683435780232 | 52.44811659311856 | 451.50303320678574 |
| CHARLS | hospital | Hospitalisation | 144.0218922907462 | 144.77049005604607 | 3463 | -43.61185005817132 | 338.5457825963769 | -43.83853596664579 | 340.305477683508 |
| HRS | any_care | Any care | 15.58976734859983 | 17.667749541560006 | 15905 | 9.16612624961577 | 21.205704262708863 | 10.387892213098036 | 24.032242649187506 |
| HRS | doctor | Doctor contact | 25.18545654581094 | 28.54510290530565 | 15885 | 18.48161291901836 | 30.868029991777775 | 20.946991438086656 | 34.985710542774136 |
| HRS | hospital | Hospitalisation | 11.486600065458944 | 13.015728763784642 | 15835 | -11.15947955798884 | 32.49817420888929 | -12.64506104887867 | 36.82442310262712 |
| MHAS | any_care | Any care | 70.04876359591796 | 72.92002927599621 | 5538 | 27.77055174209671 | 100.96545795484208 | 28.90885351989663 | 105.10398431015972 |
| MHAS | doctor | Doctor contact | 59.299681456050024 | 61.73739020116472 | 5522 | 10.493883848871365 | 93.91504568148656 | 10.925269512343618 | 97.77573299943248 |
| MHAS | hospital | Hospitalisation | 32.56672628000913 | 33.90403577088505 | 5528 | -20.109889234580663 | 95.60486229338112 | -20.93567520712947 | 99.53074936657173 |
| SHARE | any_care | Any care | 15.676248193706725 | 17.40810132823235 | 31328 | 7.536140879343942 | 22.547884840068715 | 8.368705472787807 | 25.03889063142079 |
| SHARE | doctor | Doctor contact | 12.94201960969683 | 14.37595589601582 | 30416 | 5.860260573773624 | 18.74649113734168 | 6.509559565541679 | 20.82354515933147 |
| SHARE | hospital | Hospitalisation | 32.3484333627915 | 35.923993143981505 | 31312 | 16.57669530140974 | 48.45712440552574 | 18.408962241821698 | 53.81322135134602 |

*Part C: interpretation*

| **cohort** | **outcome** | **label** | **interpretation** |
| --- | --- | --- | --- |
| CHARLS | any_care | Any care | additional care contacts per 1000 high-need adults |
| CHARLS | doctor | Doctor contact | additional care contacts per 1000 high-need adults |
| CHARLS | hospital | Hospitalisation | additional care contacts per 1000 high-need adults |
| HRS | any_care | Any care | additional care contacts per 1000 high-need adults |
| HRS | doctor | Doctor contact | additional care contacts per 1000 high-need adults |
| HRS | hospital | Hospitalisation | additional care contacts per 1000 high-need adults |
| MHAS | any_care | Any care | additional care contacts per 1000 high-need adults |
| MHAS | doctor | Doctor contact | additional care contacts per 1000 high-need adults |
| MHAS | hospital | Hospitalisation | additional care contacts per 1000 high-need adults |
| SHARE | any_care | Any care | additional care contacts per 1000 high-need adults |
| SHARE | doctor | Doctor contact | additional care contacts per 1000 high-need adults |
| SHARE | hospital | Hospitalisation | additional care contacts per 1000 high-need adults |

### Supplementary Table S19. standardised gap closure sensitivity

| **cohort** | **outcome** | **label** | **gap_closure** | **gap_per_1000_all_high_need** | **gap_per_1000_low_mid_high_need** |
| --- | --- | --- | --- | --- | --- |
| CHARLS | any_care | Any care | 0.25 | 74.18355160866096 | 74.5686984009759 |
| CHARLS | any_care | Any care | 0.5 | 148.36710321732193 | 149.1373968019518 |
| CHARLS | any_care | Any care | 1.0 | 296.73420643464385 | 298.2747936039036 |
| CHARLS | doctor | Doctor contact | 0.25 | 64.70232682172248 | 65.03863692359688 |
| CHARLS | doctor | Doctor contact | 0.5 | 129.40465364344496 | 130.07727384719377 |
| CHARLS | doctor | Doctor contact | 1.0 | 258.8093072868899 | 260.15454769438753 |
| CHARLS | hospital | Hospitalisation | 0.25 | 36.00547307268655 | 36.19262251401152 |
| CHARLS | hospital | Hospitalisation | 0.5 | 72.0109461453731 | 72.38524502802304 |
| CHARLS | hospital | Hospitalisation | 1.0 | 144.0218922907462 | 144.77049005604607 |
| HRS | any_care | Any care | 0.25 | 3.8974418371499575 | 4.416937385390002 |
| HRS | any_care | Any care | 0.5 | 7.794883674299915 | 8.833874770780003 |
| HRS | any_care | Any care | 1.0 | 15.58976734859983 | 17.667749541560006 |
| HRS | doctor | Doctor contact | 0.25 | 6.296364136452735 | 7.136275726326413 |
| HRS | doctor | Doctor contact | 0.5 | 12.59272827290547 | 14.272551452652824 |
| HRS | doctor | Doctor contact | 1.0 | 25.18545654581094 | 28.54510290530565 |
| HRS | hospital | Hospitalisation | 0.25 | 2.871650016364736 | 3.2539321909461605 |
| HRS | hospital | Hospitalisation | 0.5 | 5.743300032729472 | 6.507864381892321 |
| HRS | hospital | Hospitalisation | 1.0 | 11.486600065458944 | 13.015728763784642 |
| MHAS | any_care | Any care | 0.25 | 17.51219089897949 | 18.230007318999053 |
| MHAS | any_care | Any care | 0.5 | 35.02438179795898 | 36.46001463799811 |
| MHAS | any_care | Any care | 1.0 | 70.04876359591796 | 72.92002927599621 |
| MHAS | doctor | Doctor contact | 0.25 | 14.824920364012506 | 15.43434755029118 |
| MHAS | doctor | Doctor contact | 0.5 | 29.649840728025012 | 30.86869510058236 |
| MHAS | doctor | Doctor contact | 1.0 | 59.299681456050024 | 61.73739020116472 |
| MHAS | hospital | Hospitalisation | 0.25 | 8.141681570002282 | 8.476008942721263 |
| MHAS | hospital | Hospitalisation | 0.5 | 16.283363140004564 | 16.952017885442526 |
| MHAS | hospital | Hospitalisation | 1.0 | 32.56672628000913 | 33.90403577088505 |
| SHARE | any_care | Any care | 0.25 | 3.919062048426681 | 4.352025332058087 |
| SHARE | any_care | Any care | 0.5 | 7.838124096853362 | 8.704050664116174 |
| SHARE | any_care | Any care | 1.0 | 15.676248193706725 | 17.40810132823235 |
| SHARE | doctor | Doctor contact | 0.25 | 3.2355049024242075 | 3.593988974003955 |
| SHARE | doctor | Doctor contact | 0.5 | 6.471009804848415 | 7.18797794800791 |
| SHARE | doctor | Doctor contact | 1.0 | 12.94201960969683 | 14.37595589601582 |
| SHARE | hospital | Hospitalisation | 0.25 | 8.087108340697876 | 8.980998285995376 |
| SHARE | hospital | Hospitalisation | 0.5 | 16.17421668139575 | 17.961996571990753 |
| SHARE | hospital | Hospitalisation | 1.0 | 32.3484333627915 | 35.923993143981505 |

### Supplementary Table S20. standardised cost related unmet need gap

*Part A: source_wave, scenario, n_personwaves, n_persons, events, observed_event_rate, observed_rate*

| **cohort** | **mechanism** | **label** | **source_wave** | **scenario** | **n_personwaves** | **n_persons** | **events** | **observed_event_rate** | **observed_rate** |
| --- | --- | --- | --- | --- | --- | --- | --- | --- | --- |
| HRS | couldnt_afford_care | Could not afford care | HRS 2012 | lower/middle education reach high-education need-adjusted unmet-need probability | 1807 | 1807 | 96 | 0.0531267293857221 | 0.0531267293857221 |
| HRS | less_meds_cost | Took less medication due to cost | HRS 2012 | lower/middle education reach high-education need-adjusted unmet-need probability | 1803 | 1803 | 186 | 0.103161397670549 | 0.1031613976705515 |
| SHARE | forgo_cost | Forgone care due to cost | SHARE wave 8 | lower/middle education reach high-education need-adjusted unmet-need probability | 6025 | 6025 | 779 | 0.1292946058091286 | 0.1292946058095227 |

*Part B: what_if_rate, gap_per_1000_all_high_need, gap_per_1000_low_mid_high_need, n_low_mid_personwaves, gap_all_CI_l, gap_all_CI_u, gap_low_mid_CI_l*

| **cohort** | **mechanism** | **label** | **what_if_rate** | **gap_per_1000_all_high_need** | **gap_per_1000_low_mid_high_need** | **n_low_mid_personwaves** | **gap_all_CI_l** | **gap_all_CI_u** | **gap_low_mid_CI_l** |
| --- | --- | --- | --- | --- | --- | --- | --- | --- | --- |
| HRS | couldnt_afford_care | Could not afford care | 0.0456010099026009 | 7.525719483121173 | 8.526003201253893 | 1595 | -31.86955966265439 | 33.52619757131515 | -36.10551367424232 |
| HRS | less_meds_cost | Took less medication due to cost | 0.0644479686044851 | 38.713429066066425 | 43.84441746615437 | 1592 | -4.910168412373653 | 68.59937483806013 | -5.560950783611618 |
| SHARE | forgo_cost | Forgone care due to cost | 0.097053972479373 | 32.24063333014972 | 36.76188792849206 | 5284 | 11.193817377428376 | 53.04097047372391 | 12.763578671272894 |

*Part C: gap_low_mid_CI_u, interpretation*

| **cohort** | **mechanism** | **label** | **gap_low_mid_CI_u** | **interpretation** |
| --- | --- | --- | --- | --- |
| HRS | couldnt_afford_care | Could not afford care | 37.98234420775329 | fewer cost-related unmet-need events per 1000 high-need adults |
| HRS | less_meds_cost | Took less medication due to cost | 77.69137740767738 | fewer cost-related unmet-need events per 1000 high-need adults |
| SHARE | forgo_cost | Forgone care due to cost | 60.479153501927826 | fewer cost-related unmet-need events per 1000 high-need adults |

### Supplementary Table S21. statistical methods stress test

| **statistical issue** | **current handling** | **audit evidence** | **risk if unstated** | **revision action** | **status** |
| --- | --- | --- | --- | --- | --- |
| Survival model and cross-cohort pooling | Cohort-specific Cox models followed by DerSimonian-Laird random-effects meta-analysis. | Walking difficulty HR 2.21 with I2=73.8%; grip HR 0.70 with I2=67.9%. | Readers may interpret the pooled HR as a single universal effect despite material heterogeneity. | State that pooled estimates summarise direction and magnitude; use cohort-specific forests and I2/tau2 as heterogeneity evidence. | Addressed in report and Table S6; no new model required. |
| Unmeasured confounding for prognostic associations | E-values calculated for the functional-marker mortality associations. | Walking difficulty E-value 2.52 (CI limit 2.23); grip E-value 1.79 (CI limit 1.66). | The claim may appear vulnerable to a single unmeasured frailty or socioeconomic factor. | Report E-values as sensitivity metrics, not proof of causality. | Addressed using existing E-value table. |
| Overclaiming discrimination or screening performance | Exploratory AUC proxy is kept supplementary; main language uses risk stratifier/functional marker. | Composite supplementary 3 shows age-dominated discrimination and modest incremental value of walking difficulty. | Functional-marker language could imply validated diagnostic performance. | Avoid claiming standalone prediction-model performance unless calibration/AUROC/NRI are foregrounded. | Addressed by wording change; further prediction-model validation optional. |
| Need adjustment and residual need confounding | Health-system models adjust age, sex, year, multimorbidity, arthritis, falls, depressive symptoms, and rural residence where available. | Table S17 compares minimal and measured-need-adjusted RII/SII. | Residual severity, care quality, preferences, and supply-side access could explain some education gradients. | Use 'not fully explained by measured need' and avoid claiming complete horizontal inequity. | Addressed in wording; stronger multi-need sensitivity remains a next-round analysis. |
| RII/SII interpretation and cross-national comparability | RII estimated by cohort-year ridit logistic models; SII estimated by linear probability models with person-clustered SE. | Tables S15-S17 present both relative and absolute inequality metrics. | RII values could be read as directly ranking countries or health systems. | Interpret RII/SII within cohort; present SII and per-1000 gaps beside RII. | Addressed in report; concentration/HIwv analysis remains optional next step. |
| Standardised what-if scenario assumptions | Predicted probabilities are standardised by setting lower/middle education to high-education response parameters; uncertainty from coefficient covariance draws. | Tables 3, S19, S20, and S21 show observed, what-if, and partial-gap closure estimates. | Scenario could be mistaken for a causal intervention effect. | Name it standardised what-if scenario and list exchangeability/positivity assumptions as interpretive caveats. | Addressed by wording and table headings. |
| Cost-related unmet need evidence strength | Cohort-specific mechanism examples are kept separate and not pooled. | SHARE forgone-care gap excludes the null; HRS cost-related gaps have confidence intervals crossing zero. | Directional HRS results may be over-spun as supportive evidence. | State SHARE as the clearest cost-barrier signal; describe HRS cost estimates as uncertain. | Addressed in report text. |
| Selection and missingness in performance measures | Measurement availability and grip missingness diagnostics are in supplementary figures/tables. | Composite supplementary 3 and Table S4 show differential availability; the same composite triangulates self-report with grip. | Grip analyses may be biased toward healthier respondents able to complete testing. | Treat grip as supportive triangulation; make walking difficulty the deployable marker. | Addressed in interpretation; IPW/MI remains next-round sensitivity. |
| Multiplicity and analysis hierarchy | Primary claims are limited to the prespecified story chain; many secondary outcomes are labelled mechanism or sensitivity. | Table 2 presents the core claim set; supplementary tables hold extended outcomes. | Reviewers may view multi-outcome exploration as selective emphasis. | Define mortality, high-need profile, any-care response, and what-if gap as the core sequence; label others exploratory. | Addressed in report; formal multiplicity correction not applied. |
